# Supplementary material for: Nonsurgical versus Surgical Treatment for Cervical Radiculopathy or Myelopathy: A Systematic Review and Meta-Analysis of Randomized Controlled Trials
Source: Research Square preprint supplement (doi:10.21203/rs.3.rs-8145135/v1), 2025-11-19

**Supplementary Material**

This supplemental material has been provided by the authors to give readers additional information about their work.

**Figure S1.** PRISMA 2020 flowchart of the selection process.

**Identification of studies via other methods**

**Identification of studies via databases and registers**

Records identified from:

Grey literature sources (n = 0)

Citation searching (n = 2)

Records removed *before screening*:

Duplicate records removed (n = 195)

Records identified from:

Databases (n = 885)

Registers (n = 10)

**Identification**

Records screened

(n = 700)

Records excluded

(n = 698)

Reports not retrieved

(n = 0)

Reports sought for retrieval

(n = 2)

Reports sought for retrieval

(n = 12)

Reports not retrieved

(n = 0)

**Screening**

Reports assessed for eligibility

(n = 2)

Reports excluded (n = 2)

Reports assessed for eligibility

(n = 12)

Reports excluded (n=6):

Wrong study design (n = 4)

Wrong intervention or control (n = 2)

Studies included in review

(n = 6)

Reports of included studies

(n = 6)

**Included**

**Figure S2. Quality assessment of included trials.**


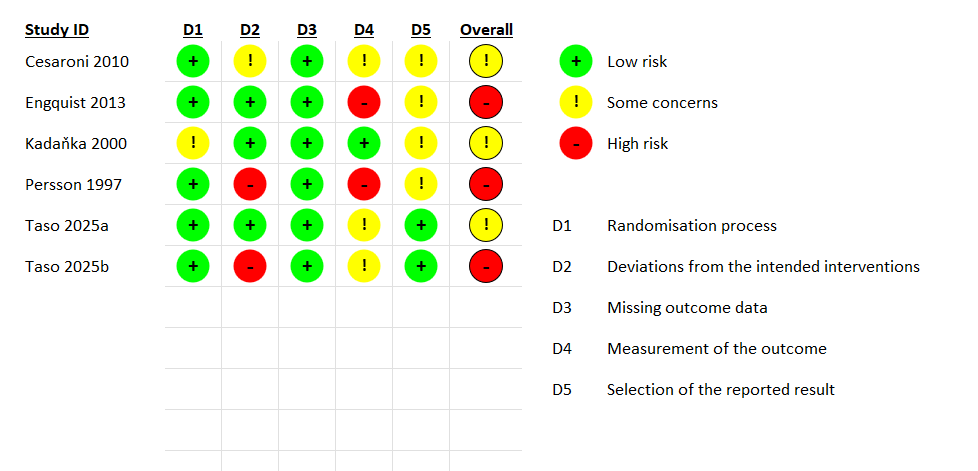


**Figure S3.** Sensitivity analysis of physical function outcomes (excluding Kadanka 2000).


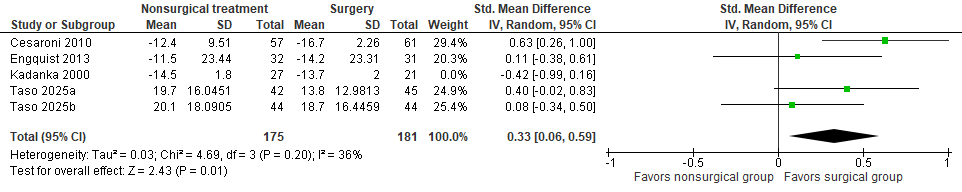


**Figure S4.** Forest plot of emotional/mood improvement.


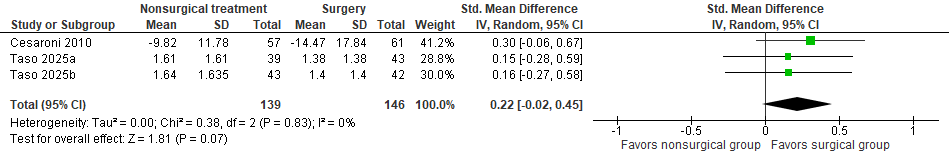


**Figure S5.** Forest plot of patient-reported symptom improvement.


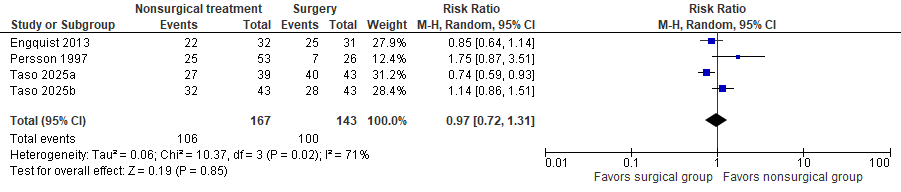


**Figure S6.** Forest plot of patient-reported analgesic use.


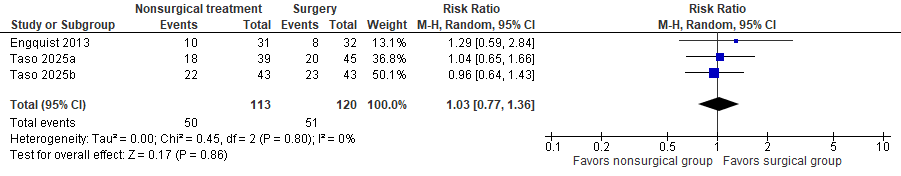

Supplement: Supplementary file 1 [file 33551bb1fb29266354c7b648.docx]
